# Supplementary material for: Generation of Hematopoietic-Like Stem Cells from Adult Human Peripheral Blood Following Treatment with Platelet-Derived Mitochondria
Source: MDPI journal article supplement (doi:10.3390/ijms21124249), 2020-06-15
Supplement: s1 [file s1]

**Supplemental Figure Legend:**

**Figure S1. Scheme of the animal protocol for *in vivo* multiple differentiation of miCD34<sup>+</sup> HSC after transplantation into irradiated NSG mice.** The purified miCD34<sup>+</sup> HSC ( $3 \times 10^5$  cells/mouse in 300  $\mu$ l physiological saline, i.v. injection via tail vein, n = 10) were transplanted into NSG mice exposed to 300 cGy irradiation using a RS-2000 x-ray irradiator. Mice injected with an equal volume of saline served as a control group (n = 6).

Figure S1

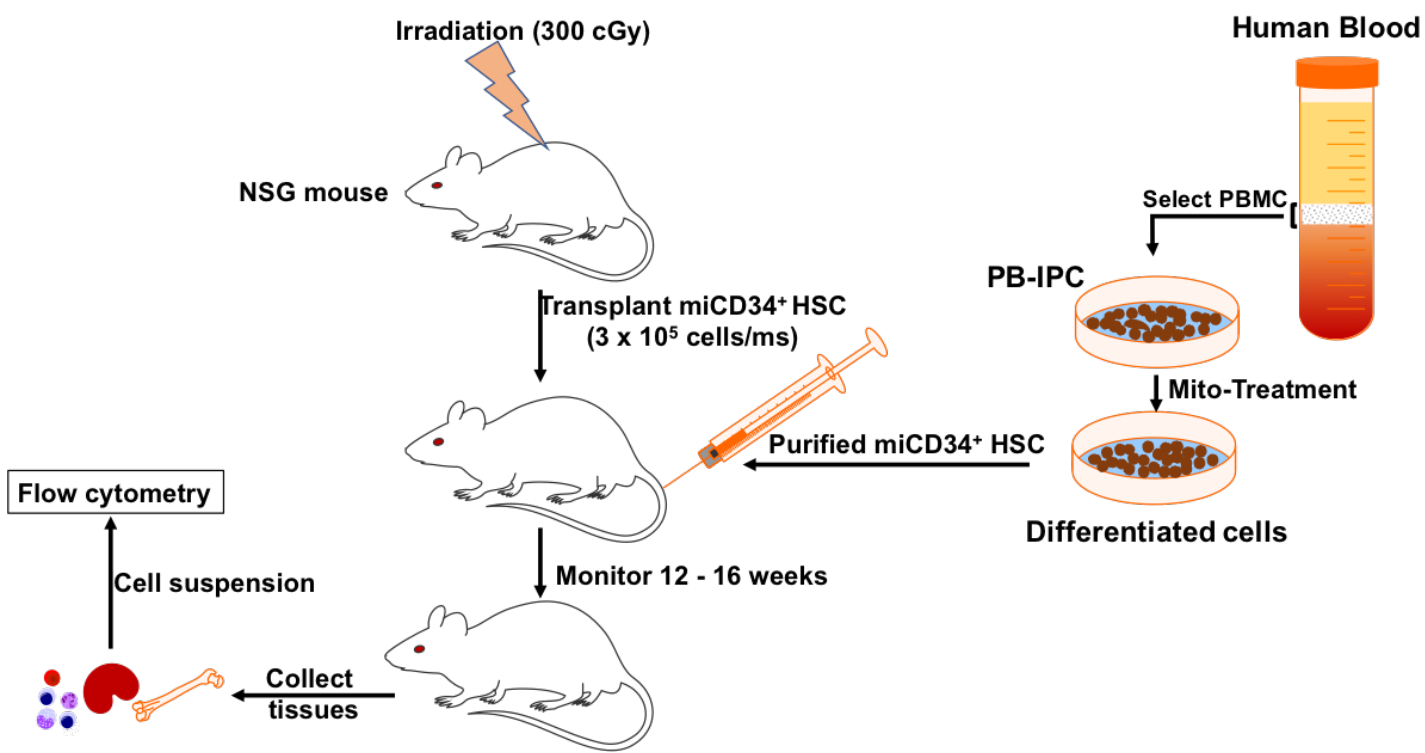

**Figure S1. Scheme of the animal protocol for *in vivo* multiple differentiation of miCD34<sup>+</sup> HSC after transplantation into irradiated NSG mice.** The purified miCD34<sup>+</sup> HSC (3 × 10<sup>5</sup> cells/mouse in 200 μl physiological saline, i.v. injection via tail vein, n = 10) were transplanted into NSG mice exposed to 300 cGy irradiation using a RS-2000 x-ray irradiator. Mice injected with an equal volume of saline served as a control group (n = 6).
